# Supplementary material for: Effects of UV Radiation on the Chlorophyte Micromonas polaris Host–Virus Interactions and MpoV-45T Virus Infectivity
Source: MDPI journal article supplement (doi:10.3390/microorganisms9122429), 2021-11-25
Supplement: s1 [file s1]

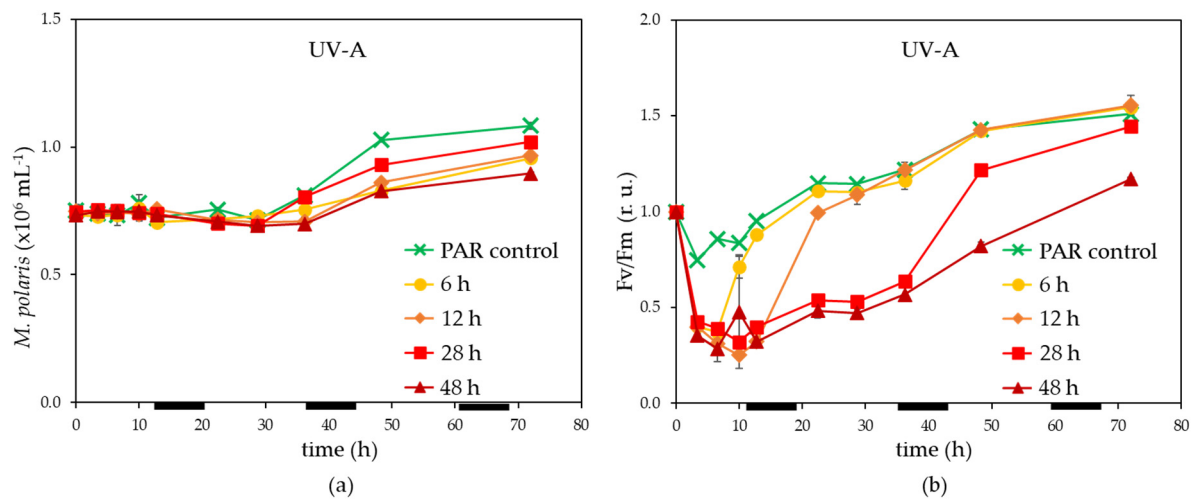

**Figure S1:** Exposure of non-infected *M. polaris* to UV-A radiation. (a) Phytoplankton abundance dynamics, (b) Photosynthetic efficiency ( $F_v/F_m$ , relative units r.u., normalized to starting value). Average values with standard deviation ( $n = 2$  except for PAR-only control and 28 h UV-AB where  $n = 1$ ). The horizontal black bars indicate the dark period.

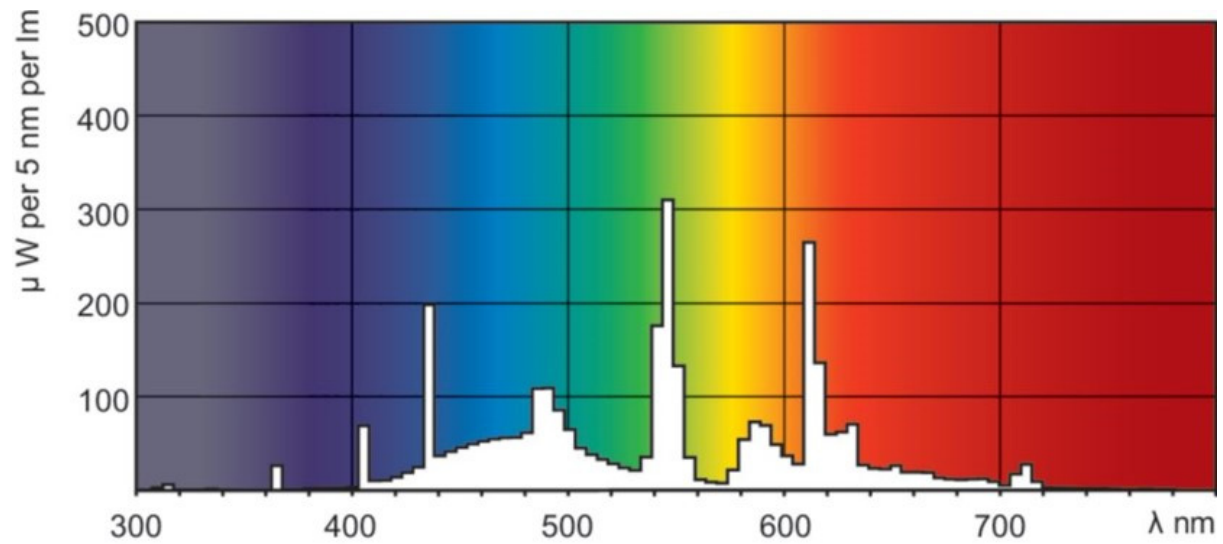

**Figure S2:** Light spectrum of lamps used to provide PAR.

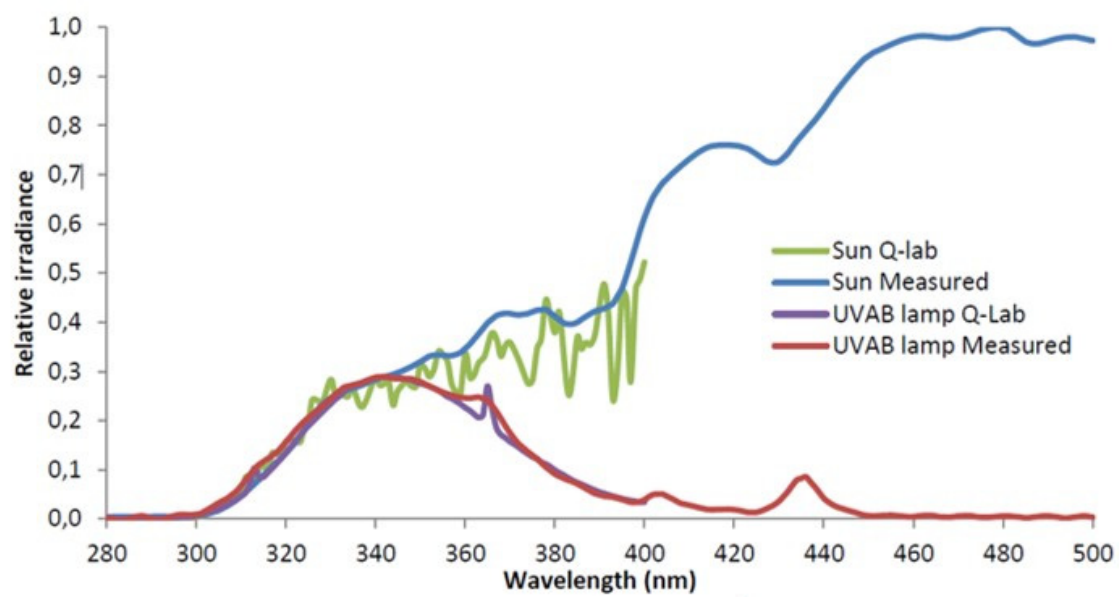

**Figure S3:** Light spectrum of UV-AB lamps.

**Table S1:** UV-AB intensities and attenuation coefficients ( $\mu_{ac}$ ). The averages of these values were used to calculate the average UV-dose received in the Mixed Layer Depth (MLD) of polar regions. Average  $\mu_{ac}$  for the Arctic were 0.665 and 0.28 for UV-A and UV-B, respectively, with average UV-intensities (UV-I) of 6.6 and 0.4 each and MLD was up to 30 m. For the Southern Ocean, average  $\mu_{ac}$  were 0.38 and 0.28 for UV-A and UV-B, with average intensities of 27.9 and 1.1 for UV-A and UV-B, respectively, with a maximum MLD of 50 m. The UV-intensity at a given depth ( $UV - I_D$ ) was calculated using the following formula following formula:  $UV - I_D = UV - I * e^{n*(-\mu_{ac})}$ , with n being the depth in meter in steps of 1. The resulting values were averaged over the MLD for each region to get to the average UV-Intensity within the mixed layer.

|                | UV-Intensities            |                           |           | Attenuation Coefficients |                         |           |
|----------------|---------------------------|---------------------------|-----------|--------------------------|-------------------------|-----------|
|                | UV-A (W m <sup>-2</sup> ) | UV-B (W m <sup>-2</sup> ) | reference | UV-A (m <sup>-1</sup> )  | UV-B (m <sup>-1</sup> ) | reference |
| Arctic         | 0.38 - 0.47               | 0.015 - 0.0189            | [1]       | 0.39 - 0.94              | 0.225                   | [2]       |
|                | 19                        | 1.09                      | [3]       |                          | 0.34                    | [4]       |
| Southern Ocean |                           | 1.8                       | [2]       |                          |                         |           |
|                | 35                        | 0.9                       | [5]       | 0.19 - 1.1               |                         | [2]       |
|                | 20.8                      | 0.5                       | [6]       | 0.157 - 0.262            | 0.284                   | [7]       |

**Table S2:** Values needed to calculate UV-C exposure times: Three phytoplankton viruses were exposed to UV-C doses between 0 – 800 mJ cm<sup>-2</sup>. UV-C doses were controlled by exposure time. Needed exposure time was calculated following [8] using the following values:

|                                                                     |                                   |
|---------------------------------------------------------------------|-----------------------------------|
| Solution volume                                                     | 15 mL                             |
| Water path length                                                   | 0.63 cm                           |
| Distance UV-lamp to water surface                                   | 48.6 cm                           |
| Divergence Factor                                                   | 0.9872                            |
| Absorption Coefficient                                              | 0.008 cm <sup>-1</sup>            |
| Total Absorbance                                                    | 0.001                             |
| Water Factor                                                        | 0.9988                            |
| Petri Factor                                                        | 0.818 – 0.832 mW cm <sup>-2</sup> |
| Reflection Factor                                                   | 0.975                             |
| Divergence Factor                                                   | 0.986                             |
| Resulting average germicidal irradiance throughout the water column | 0.644 – 0.666 mW cm <sup>-2</sup> |

**Table S3:** Abundances of *Micromonas polaris* ( $\times 10^5 \text{ mL}^{-1}$ ) for cultures without viruses added (C) and with MpoV-45T added (V), exposed to PAR-only (controls) or UV-AB for total duration of 6, 12, 28 and 48 h for experiment 1 and experiment 2 ( $n = 2$ , except for Exp. 1 PAR-only controls where  $n = 1$ ).

| Exp. 1   | PAR-only |     | 6 h |     |     |     | 12 h |      |     |     | 48 h |     |     |     |
|----------|----------|-----|-----|-----|-----|-----|------|------|-----|-----|------|-----|-----|-----|
| Time (h) | C 1      | V 1 | C 1 | C 2 | V 1 | I 2 | C 1  | C 2  | V 1 | V 2 | C 1  | C 2 | V 1 | V 2 |
| 0.0      | 5.6      | 5.2 | 5.3 | 5.4 | 5.2 | 5.3 | 5.6  | 5.6  | 5.8 | 5.6 | 5.4  | 5.5 | 5.5 | 5.6 |
| 3.3      | 5.9      | 5.2 | 5.2 | 5.3 | 5.3 | 5.1 | 5.6  | 5.4  | 5.5 | 5.4 | 5.3  | 5.5 | 5.3 | 5.4 |
| 6.6      | 6.4      | 5.7 | 5.7 | 5.6 | 5.8 | 5.6 | 6.0  | 5.9  | 6.1 | 6.2 | 5.9  | 5.9 | 5.8 | 5.8 |
| 9.7      | 5.9      | 5.6 | 5.6 | 5.3 | 5.5 | 5.4 | 5.9  | 5.9  | 5.8 | 5.4 | 6.1  | 5.8 | 5.7 | 5.9 |
| 12.7     | 6.3      | 5.4 | 5.3 | 5.5 | 5.2 | 5.4 | 6.2  | 5.7  | 5.8 | 5.7 | 5.5  | 5.6 | 5.8 | 5.6 |
| 20.9     | 6.6      | 5.6 | 5.4 | 6.0 | 5.2 | 5.5 | 5.8  | 5.6  | 5.2 | 5.5 | 5.6  | 6.1 | 5.3 | 5.5 |
| 28.5     | 6.6      | 5.2 | 5.6 | 5.5 | 5.2 | 4.9 | 6.0  | 5.7  | 5.5 | 5.4 | 5.8  | 5.9 | 4.8 | 5.1 |
| 47.7     | 8.1      | 4.6 | 6.3 | 7.1 | 4.2 | 4.9 | 6.8  | 8.4  | 5.5 | 4.7 | 5.5  | 5.8 | 4.6 | 4.5 |
| 71.9     | 9.3      | 2.9 | 8.2 | 9.1 | 2.6 | 3.0 | 8.4  | 10.1 | 3.1 | 2.5 | 5.0  | 5.3 | 1.9 | 1.6 |

| Exp. 2   | PAR-only |      |     |     | 28 h UV |      |     |     | 48 h UV |     |     |     |
|----------|----------|------|-----|-----|---------|------|-----|-----|---------|-----|-----|-----|
| Time (h) | C 1      | C 2  | V 1 | V 2 | C 1     | C 2  | V 1 | V 2 | C 1     | C 2 | V 1 | V 2 |
| 0        | 7.8      | 7.2  | 7.2 | 7.4 | 7.5     | 7.7  | 7.5 | 7.4 | 7.3     | 7.3 | 7.4 | 7.4 |
| 2        | 7.3      | 7.2  | 7.3 | 7.2 | 7.5     | 7.5  | 7.5 | 7.3 | 7.2     | 7.6 | 7.2 | 7.0 |
| 6        | 7.1      | 6.9  | 7.2 | 7.2 | 7.5     | 7.7  | 7.6 | 7.5 | 7.6     | 7.3 | 7.3 | 7.3 |
| 10       | 7.1      | 7.0  | 7.0 | 6.6 | 7.4     | 7.6  | 7.4 | 7.4 | 7.4     | 7.2 | 7.6 | 7.1 |
| 14       | 7.4      | 7.2  | 7.2 | 6.8 | 7.6     | 7.6  | 7.1 | 6.8 | 7.5     | 7.6 | 7.3 | 7.3 |
| 25       | 8.0      | 8.2  | 7.4 | 6.8 | 7.8     | 8.1  | 7.2 | 7.1 | 7.8     | 7.7 | 7.1 | 6.9 |
| 35       | 8.0      | 8.4  | 6.1 |     | 7.7     | 7.7  | 6.9 | 6.4 | 7.6     | 7.7 | 6.4 | 6.4 |
| 49       | 10.0     | 9.5  |     | 5.7 | 8.1     | 8.1  | 5.3 | 5.6 | 7.4     | 7.8 | 5.4 | 4.9 |
| 59       | 10.5     | 10.1 | 5.3 | 5.0 | 9.1     | 9.2  | 5.2 | 4.9 | 7.2     | 8.0 | 4.1 | 3.5 |
| 71       | 13.7     | 13.9 | 4.5 | 4.4 | 10.6    | 10.8 | 4.4 | 4.1 | 7.6     | 8.3 | 2.4 | 1.6 |

**Table S4:** Abundances of MpoV-45T ( $\times 10^6$  mL<sup>-1</sup>) from infected *Micromonas polaris* cultures exposed to PAR-only (controls) or UV-AB for total duration of 6, 12, 28 and 48 h for Experiment 1 and Experiment 2 ( $n = 2$ , except for Exp. 1 PAR-only controls, there  $n = 1$ ). Due to technical failure no values were obtained for Exp. 2, 48 h treatment, T0.

| Exp. 1   | PAR-only | 6 h  |      | 12 h |      | 48 h |      |
|----------|----------|------|------|------|------|------|------|
| Time (h) | V 1      | V 1  | V 2  | V 1  | V 2  | V 1  | V 2  |
| 0        | 6.6      | 7.7  | 7.1  | 5.1  | 5.1  | 7.3  | 8.5  |
| 3        | 10.2     | 8.5  | 8.3  | 9.4  | 5.3  | 8.4  | 9.2  |
| 7        | 7.2      | 7.5  | 10.3 | 11.2 | 8.5  | 8.6  | 10.4 |
| 10       | 7.8      | 0.0  | 9.9  | 9.8  | 8.1  | 10.7 | 6.8  |
| 13       | 13.6     | 8.3  | 7.1  | 0.0  | 6.5  | 8.1  | 7.9  |
| 21       | 9.2      | 6.2  | 9.5  | 5.6  | 6.6  | 6.8  | 8.4  |
| 28       | 14.2     | 12.6 | 10.9 | 14.0 | 13.0 | 10.7 | 11.7 |
| 48       | 25.1     | 31.8 | 28.0 | 30.9 | 23.5 | 20.8 | 32.0 |
| 72       | 45.9     | 48.7 | 39.4 | 38.5 | 47.5 | 25.5 | 22.7 |

| Exp. 2   | PAR-only |      | 28 h UV |      | 48 h UV |      |
|----------|----------|------|---------|------|---------|------|
| Time (h) | V 1      | V 2  | V 1     | V 2  | V 1     | V 2  |
| 0        | 12.4     | 10.0 | 10.8    | 10.4 |         |      |
| 2        | 8.7      | 13.0 | 10.3    | 11.9 | 9.7     | 8.4  |
| 6        | 11.2     | 9.3  | 14.5    | 9.4  | 12.2    | 7.7  |
| 10       | 7.4      | 8.1  | 7.1     | 10.7 | 9.5     | 4.5  |
| 14       | 4.8      | 3.7  | 4.4     | 4.5  | 5.0     | 5.4  |
| 25       | 17.0     | 13.4 | 8.9     | 7.9  | 7.9     | 10.9 |
| 35       | 15.4     | 17.2 | 13.1    | 12.1 | 11.0    | 9.4  |
| 49       | 25.8     | 32.0 | 26.1    | 25.9 | 18.3    | 15.1 |
| 59       | 40.9     | 35.4 | 26.1    | 24.0 | 23.0    | 15.8 |
| 71       | 42.2     | 37.1 | 23.1    | 28.3 | 19.0    | 14.9 |

## References

1. Lakkala, K.; Jaros, A.; Aurela, M.; Tuovinen, J.P.; Kivi, R.; Suokanerva, H.; Karhu, J.M.; Laurila, T. Radiation measurements at the Pallas-Sodankylä Global Atmosphere Watch Station — diurnal and seasonal cycles of ultraviolet, global and photosynthetically-active radiation. *Boreal Environ. Res.* **2016**, *21*, 427–444.
2. Hoyer, K. Occurrence, induction and physiological importance of UV-absorbing substances in polar macroalgae= Vorkommen, Induktion und physiologische Bedeutung UV-absorbierender Substanzen in polaren Makroalgen. *Berichte zur Polar-und Meeresforschung= Reports polar Mar. Res.* **2003**, *440*, 155.
3. Bischof, K.; Hanelt, D.; Tüg, H.; Karsten, U.; Brouwer, P.E.M.; Wiencke, C. Acclimation of brown algal photosynthesis to ultraviolet radiation in Arctic coastal waters (Spitsbergen, Norway). *Polar Biol.* **1998**, *20*, 388–395, doi:10.1007/s0030000050319.
4. Hanelt, D.; Tüg, H.; Bischof, K.; Groß, C.; Lippert, H.; Sawall, T.; Wiencke, C. Light regime in an Arctic fjord: A study related to stratospheric ozone depletion as a basis for determination of UV effects on algal growth. *Mar. Biol.* **2001**, *138*, 649–658, doi:10.1007/s002270000481.
5. Buma, A.G.J.; De Boer, M.K.; Boelen, P. Depth distributions of DNA damage in antarctic marine phyto and bacterioplankton exposed to summertime UV radiation. *J. Phycol.* **2001**, *37*, 200–208, doi:10.1046/j.1529-8817.2001.037002200.x.
6. Hughes, K.A. Influence of seasonal environmental variables on the distribution of presumptive fecal coliforms around an Antarctic research station. *Appl. Environ. Microbiol.* **2003**, *69*, 4884–4891, doi:10.1128/AEM.69.8.4884-4891.2003.
7. Figueroa, F.L. Bio-optical characteristics of Gerlache and Bransfield Strait waters during an Antarctic summer cruise. *Deep. Res. Part II Top. Stud. Oceanogr.* **2002**, *49*, 675–691, doi:10.1016/S0967-0645(01)00118-7.
8. Bolton, J.R.; Linden, K.G. Standardization of Methods for Fluence (UV Dose) Determination in Bench-Scale UV Experiments. *J. Environ. Eng.* **2003**, *129*, 209–215.
